# Supplementary material for: Inhibition as a Binary Switch for Excitatory Plasticity in Pyramidal Neurons
Source: PubMed Central journal article supplement (PMC4803338; doi:10.1371/journal.pcbi.1004768), 2016-03-22
Supplement: pcbi.1004768.s007.pdf [file pcbi.1004768.s007.pdf]

**Table 1. Parameters of the simplified morphology model.**

| Parameter      | Value                          | Parameter          | Value                           |
|----------------|--------------------------------|--------------------|---------------------------------|
| $C_m$          | $0.75 \mu\text{F}/\text{cm}^2$ | $s.\bar{g}_{K,A}$  | $0.029 \text{ S}/\text{cm}^2$   |
| $R_a$          | $150 \Omega\text{cm}$          | $s.\bar{g}_{Ca,H}$ | $0.00030 \text{ S}/\text{cm}^2$ |
| $R_m$          | $40,000 \Omega\text{cm}^2$     | $s.\bar{g}_{K,Ca}$ | $0.0005 \text{ S}/\text{cm}^2$  |
| $E_{leak}$     | $-70 \text{ mV}$               | $d.\bar{g}_{Ca,H}$ | $0.00015 \text{ S}/\text{cm}^2$ |
| $E_{Na}$       | $+60 \text{ mV}$               | $d.\bar{g}_{K,Ca}$ | $0.00025 \text{ S}/\text{cm}^2$ |
| $E_K$          | $-80 \text{ mV}$               | $a.\bar{g}_{Ca,H}$ | $0.00045 \text{ S}/\text{cm}^2$ |
| $E_{Ca}$       | $+140 \text{ mV}$              | $a.\bar{g}_{K,Ca}$ | $0.00025 \text{ S}/\text{cm}^2$ |
| $\bar{g}_{Na}$ | $0.009 \text{ S}/\text{cm}^2$  | $a.\bar{g}_{Ca,L}$ | $0.005 \text{ S}/\text{cm}^2$   |
| $\bar{g}_K$    | $0.01 \text{ S}/\text{cm}^2$   | $ax.\bar{g}_{Na}$  | $0.6 \text{ S}/\text{cm}^2$     |

s-soma, d-dendrite, a-apical calcium spike initiation zone, ax-axon. For  $\bar{g}_{K,A}$ , only the somatic value is given. But A-type potassium channels were present in all dendritic compartments, their density linearly increased 5-fold up to  $500 \mu\text{m}$  from the soma.  $\bar{g}_{Na}$  and  $\bar{g}_K$  were uniformly distributed, only in the axon,  $\bar{g}_{Na}$  had a different value.
